# Supplementary material for: A FinFET with one atomic layer channel
Source: PubMed Central journal article supplement (PMC7058032; doi:10.1038/s41467-020-15096-0), 2020-03-05
Supplement: 41467_2020_15096_MOESM1_ESM.pdf [file 41467_2020_15096_MOESM1_ESM.pdf]

Supplementary Materials for

**A FinFET with one atomic layer channel**

Chen, Sun, and Liu, *et al.*

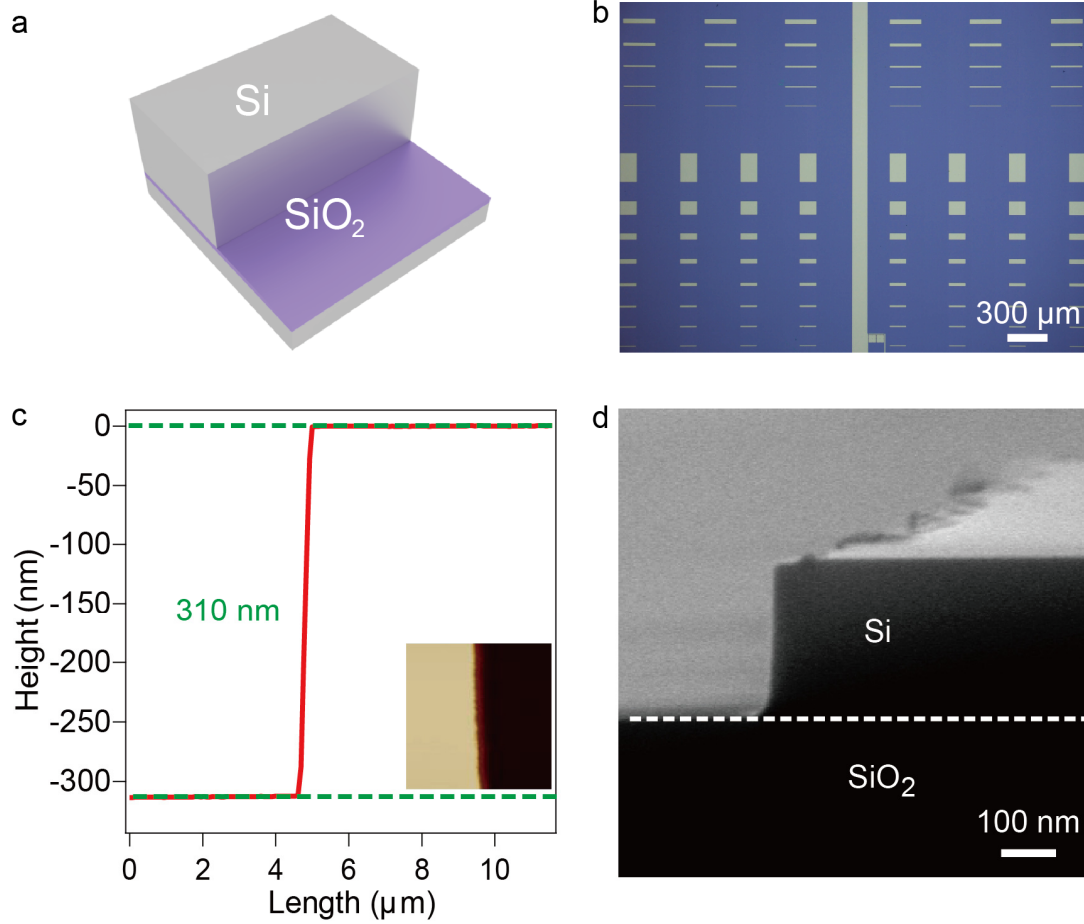

**Supplementary Figure 1. The structure of Si-step array.** (a) Schematic diagram of the Si step. (b) Optical image for different sizes of Si step arrays. (c) AFM image of the height for the Si step. (d) SEM image for the cross section of the Si step.

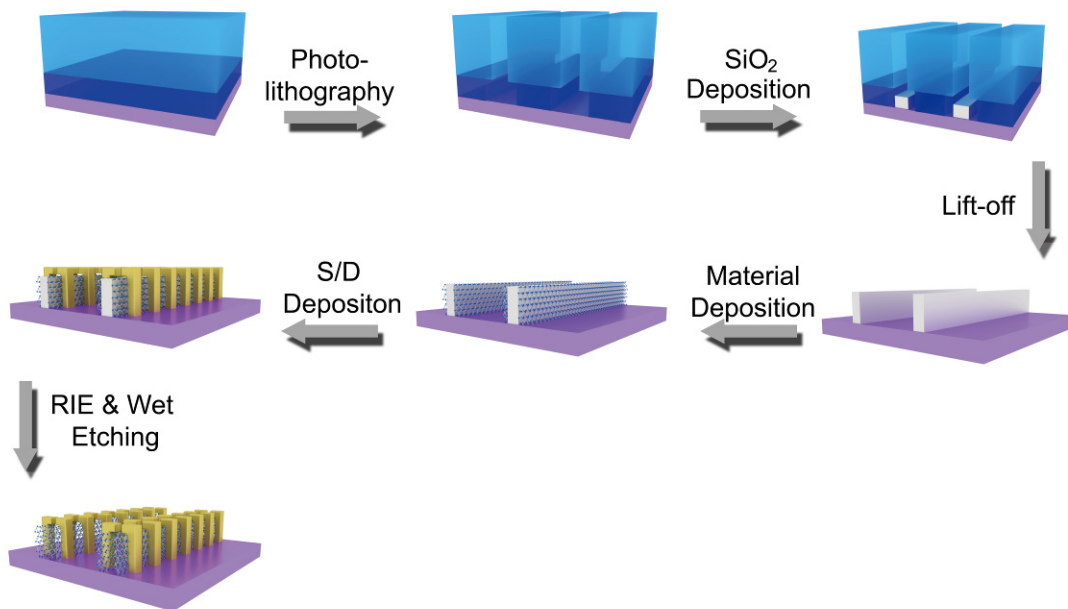

**Supplementary Figure 2. The fabrication flow diagram of WS<sub>2</sub> FinFET on SiO<sub>2</sub> step substrate using the initial method.** 200 nm SiO<sub>2</sub> is deposited by standard lithograph process followed by using magnetron sputtering method. Then single layer WS<sub>2</sub> is synthesized by using CVD method shown in fig. S11. Then gold electrodes are evaporated using standard EBL process. Finally, SiO<sub>2</sub> is wet etched within NaOH solution. (The material is exposed outside during the Reactive-ion etching (RIE) and wet etching process, which may be the reason for the sample damage.) The details of this method will be shown in the following Supplementary Figure 3, 4 and 6.

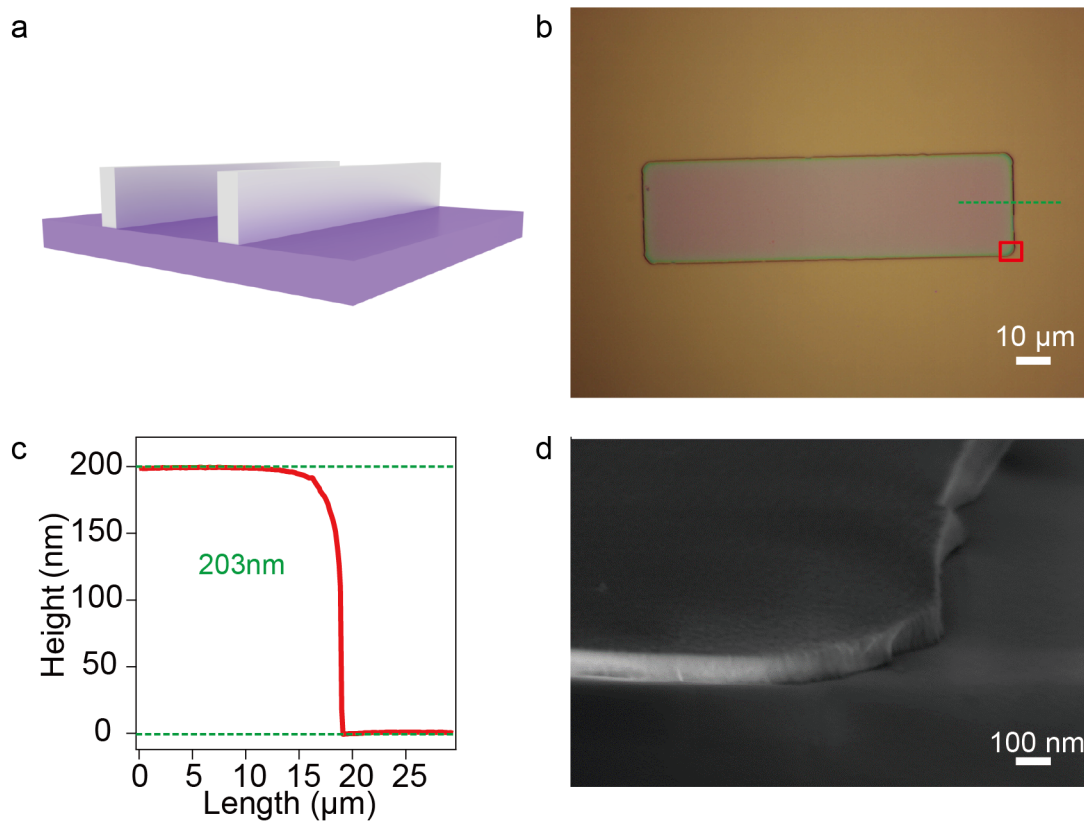

**Supplementary Figure 3. The characterization of SiO<sub>2</sub> steps.** (a) Schematic diagram of SiO<sub>2</sub> steps. (b) Optical image for a SiO<sub>2</sub> step. (c) AFM line scanning (height profiles) image along the green line from left to right shown in (b). (d) Side view of SEM image (80-degree inclination) for the red rectangle section shown in (b).



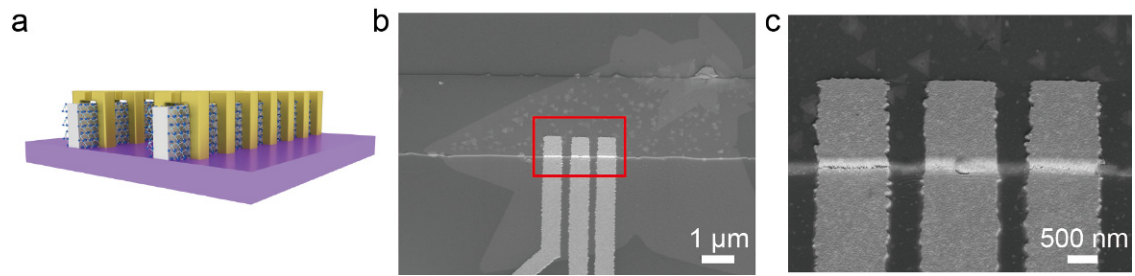

**Supplementary Figure 4. Source/Drain (S/D) electrodes on the SiO<sub>2</sub>-steps.** (a) Schematic diagram of the S/D electrodes on the SiO<sub>2</sub> steps. (b) SEM image (30-degree inclination) of the S/D electrodes on the SiO<sub>2</sub> step. (c) Magnification SEM image for the red rectangle section shown in (b), which shows that WS<sub>2</sub> is continuously and uniformly grown across the step.

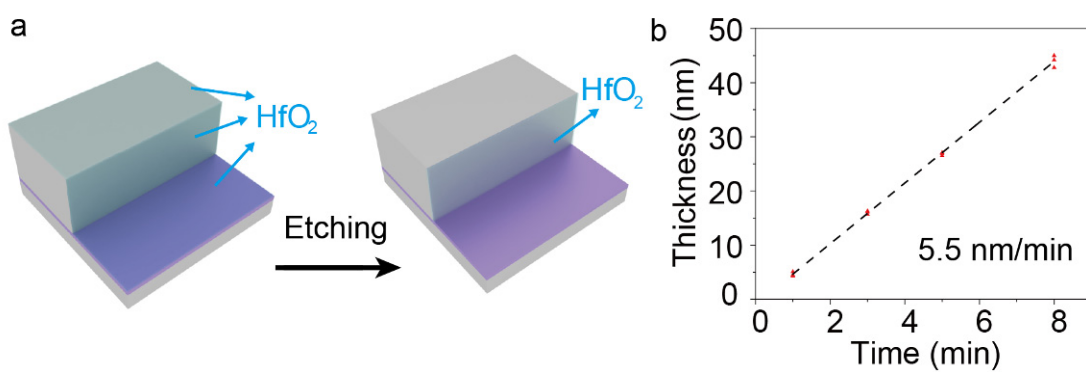

**Supplementary Figure 5. The etching process of the plane-removing of HfO<sub>2</sub>.** (a) Schematic diagram of the planar HfO<sub>2</sub> etching process using RIE, only side-wall of HfO<sub>2</sub> is left after etching. (b) The thickness of HfO<sub>2</sub> for different etching time with etching rate of 5.5 nm/min.

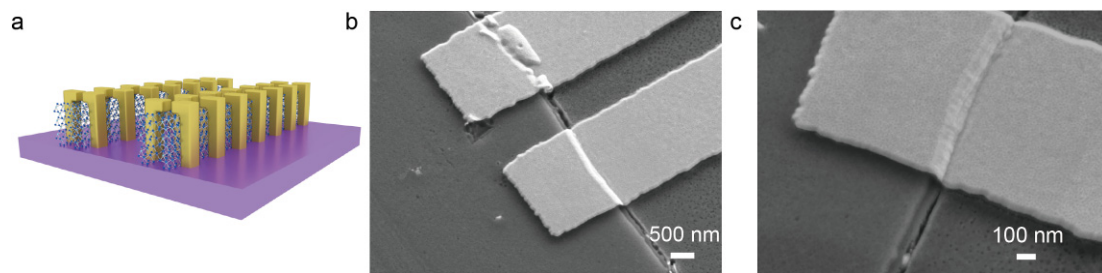

**Supplementary Figure 6. Wet-etching of the remaining SiO<sub>2</sub>-step.** (a) Schematic diagram of the structure after RIE and SiO<sub>2</sub> steps are wet etched. (b) SEM Optical image (30-degree inclination) for the S/D electrodes and WS<sub>2</sub> nano-fin structure. (c) Magnification SEM image for the same sample shown in (b) but with a different perspective. It shows that most part of the WS<sub>2</sub> nano-fin was etched away, and its device was still not conductive, since the SiO<sub>2</sub> sidewalls did not stand vertically enough.

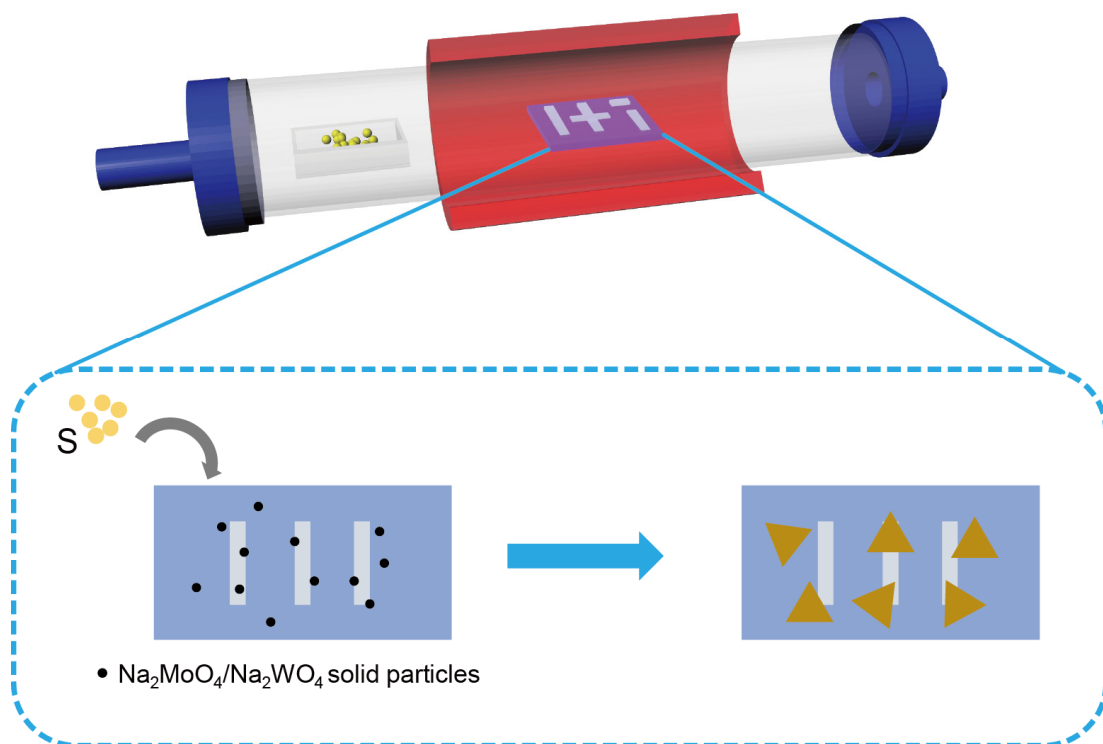

**Supplementary Figure 7. The CVD setup for  $\text{MoS}_2$  and  $\text{WS}_2$  synthesis.** Schematic of CVD process and zoomed-in growth process diagrams before and after depositing, which are shown in the dotted blue rectangle. The circles in gold and grey represent the S and  $\text{Na}_2\text{MoO}_4/\text{Na}_2\text{WO}_4$  precursor, respectively. The orange triangles indicate the deposited samples.

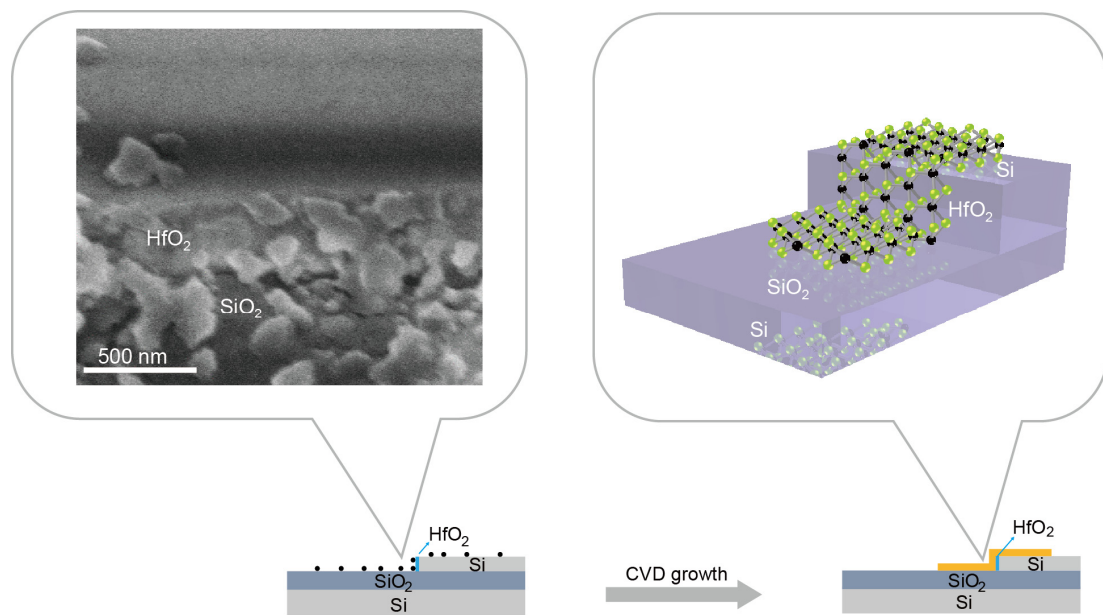

**Supplementary Figure 8. Schematics of the growth mechanism of monolayered TMDs.** The substrates before (left) and after (after) TMDs growth. The enlarged figures marked by the black squares show the SEM image near the step in (left) and schematic of the step after sample deposition, respectively.

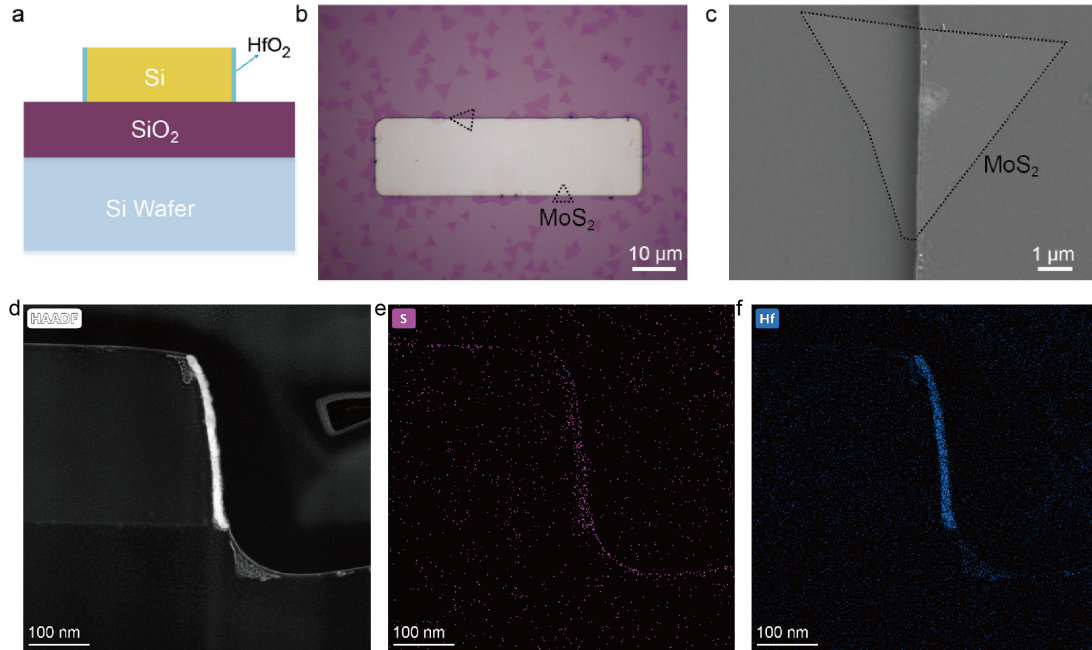

**Supplementary Figure 9. CVD synthesized MoS<sub>2</sub> on HfO<sub>2</sub> coated sidewall.** (a) Schematic diagram of CVD synthesis substrate. (b) Optical image of few layer single-crystal MoS<sub>2</sub> marked by the black dotted lines grown on both SiO<sub>2</sub> (purple) and Si (yellow) substrate plane. (c) SEM image of few layer single-crystal MoS<sub>2</sub> marked by the dotted black lines continuously grown across the HfO<sub>2</sub> coated sidewalls. (d) TEM cross-section shows the continuous growth of monolayer TMD over the HfO<sub>2</sub> side wall. (e) and (f) are EDS mapping of S and Hf element, respectively. The TEM specimen was fabricated using a sample at the stage of (e) in Figure 2 in the main text.

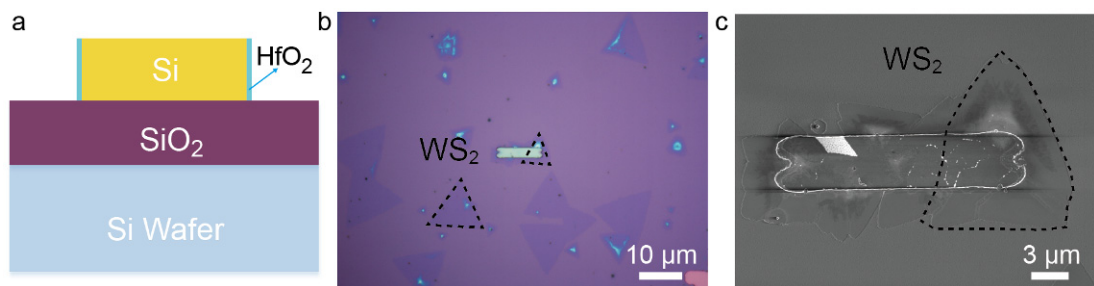

**Supplementary Figure 10. CVD synthesized WS<sub>2</sub> on HfO<sub>2</sub> coated sidewall.** (a) Schematic diagram of CVD synthesis substrate with HfO<sub>2</sub> coated sidewall. (b) Optical image of few layer single-crystal WS<sub>2</sub> marked by the black dotted lines grown on both SiO<sub>2</sub> (purple) and Si (yellow) substrate planes. (c) SEM image of few layer single-crystal WS<sub>2</sub> continuously grown across the HfO<sub>2</sub> coated sidewall.

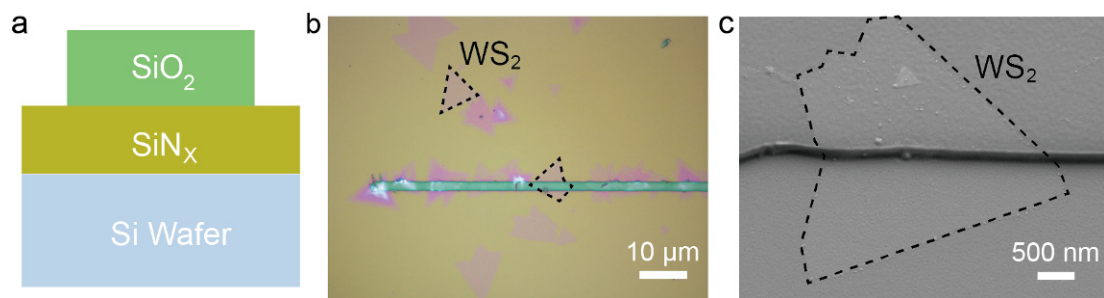

**Supplementary Figure 11. CVD synthesized  $\text{WS}_2$  on  $\text{SiO}_2$  sidewall.** (a) Schematic diagram of CVD synthesis substrate. (b) Optical image of few layer  $\text{WS}_2$  (pink) marked by the black dotted lines grown on both  $\text{SiN}_x$  (yellow) and  $\text{SiO}_2$  (green). (c) Scanning electron microscope (SEM) image of a few layer single-crystal  $\text{WS}_2$ , which is marked by the black dotted lines continuously grown across the  $\text{SiO}_2$  sidewall.



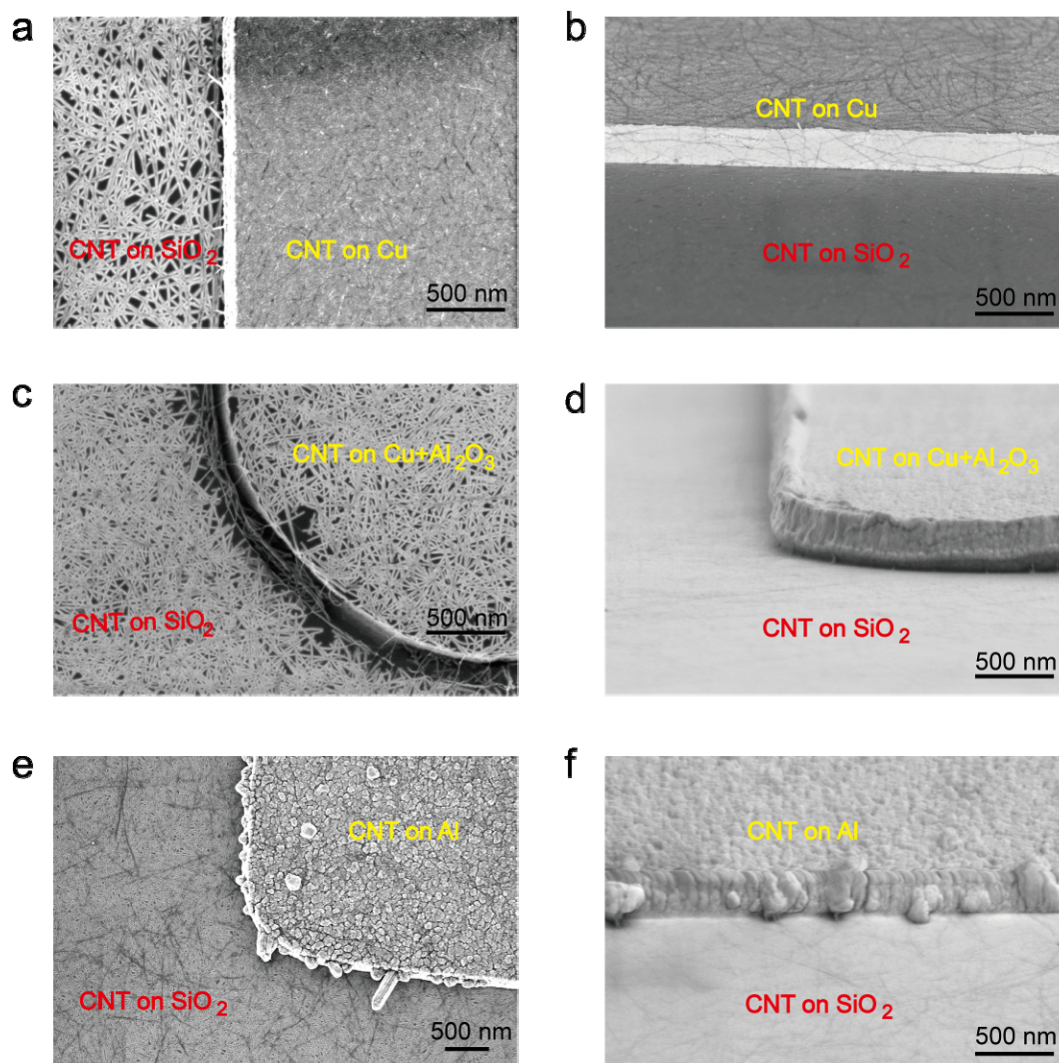

**Supplementary Figure 12. SEM images for the CNT deposited on metal substrates.** Top (a) and side (b) views of SEM images for the CNT deposited on 400 nm height Cu step. The SEM images for the top (c) and side (d) views of the CNT deposited on the 400 nm Cu covered by 50 nm  $\text{Al}_2\text{O}_3$  step. SEM images for the top (e) and side (f) views of the CNT deposited on the 400 nm Al step.

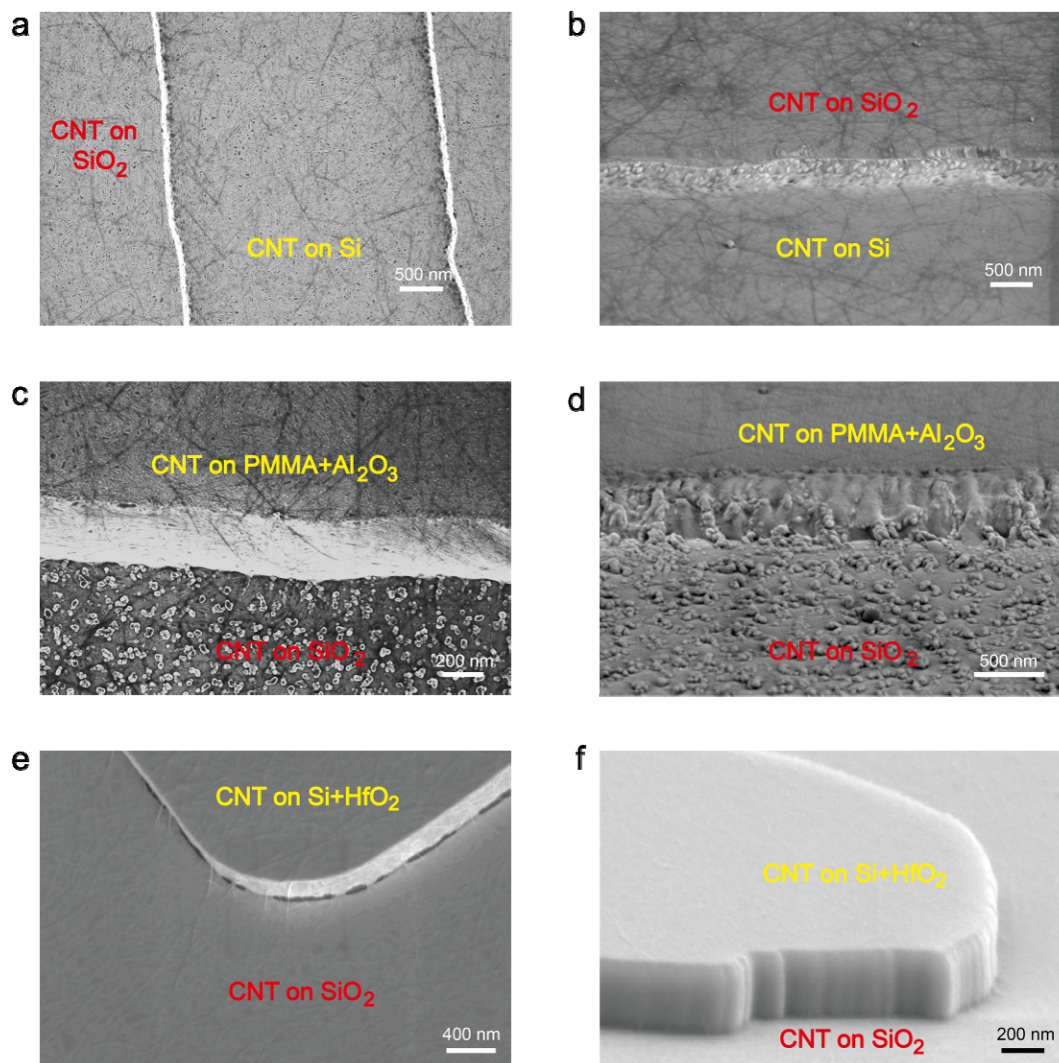

**Supplementary Figure 13. SEM images for the CNT deposited on non-metal substrates.** The SEM images for the top (a) and side (b) views of the CNT deposited on the 200 nm SiO<sub>2</sub> step. The SEM images for the top (c) and side (d) views of CNT deposited on the 600 nm PMMA covered by 30 nm Al<sub>2</sub>O<sub>3</sub> step. The SEM images for the top (e) and side (f) views of CNT deposited on the 300 nm Si covered by 10 nm HfO<sub>2</sub> step.



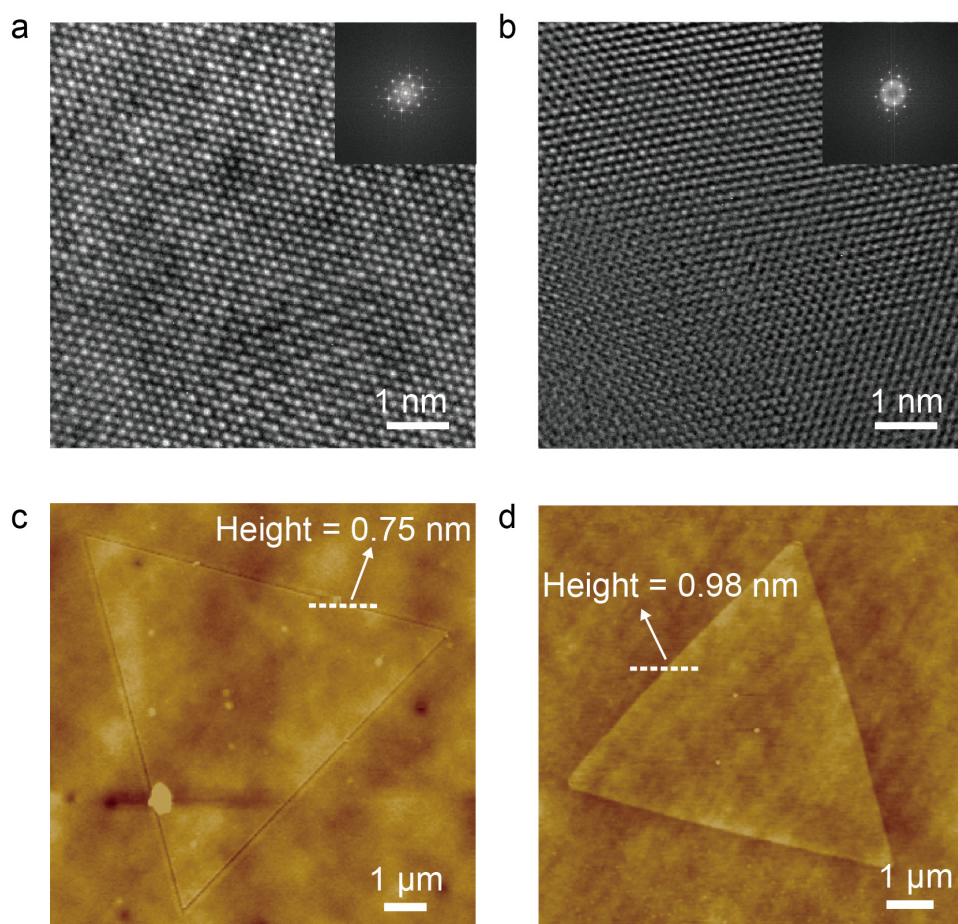

**Supplementary Figure 14. High-resolution transmission electron microscopy (HRTEM) and atomic force microscopy (AFM) images of the TMDs.** HRTEM and inset SAED images of single layer MoS<sub>2</sub> (a) and WS<sub>2</sub> (b), respectively. AFM mappings of single layer MoS<sub>2</sub> (c) and WS<sub>2</sub> (d), respectively.

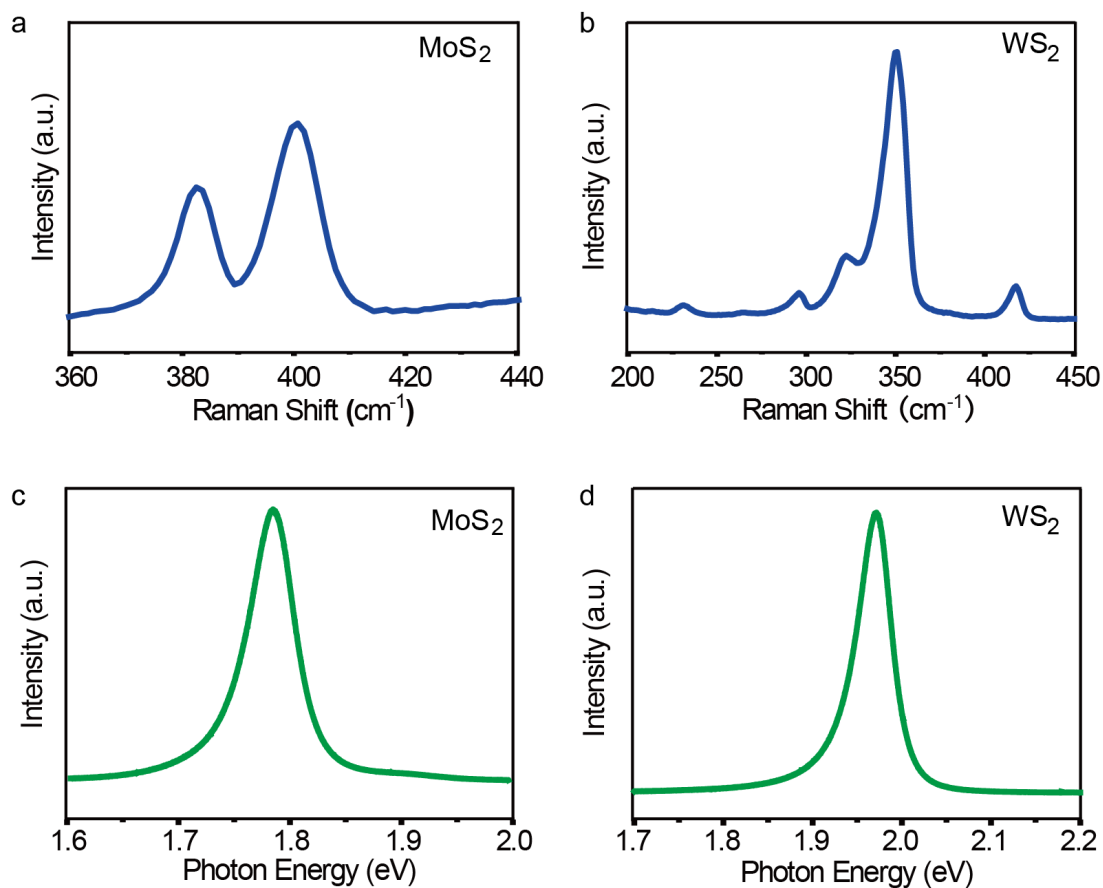

**Supplementary Figure 15. Raman spectroscopy and Photoluminescence (PL) spectrum of the TMDs.** Raman spectra of single layer MoS<sub>2</sub> crystal (a) and WS<sub>2</sub> (b), respectively. PL spectrums of single layer MoS<sub>2</sub> (c) and WS<sub>2</sub> (d), respectively.

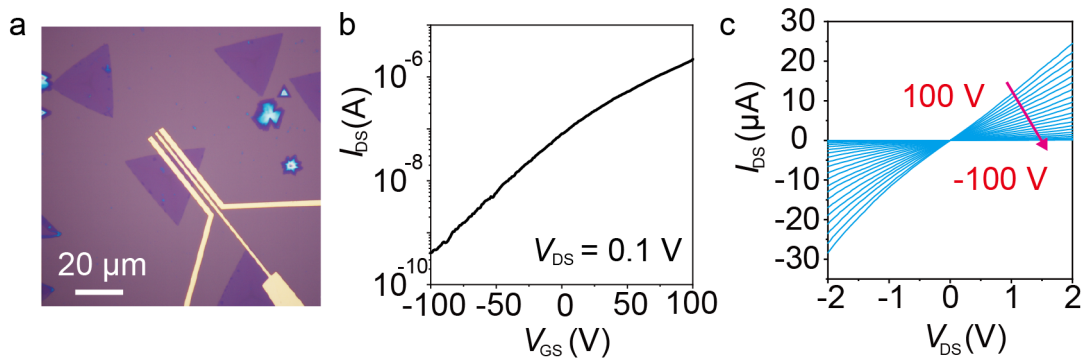

**Supplementary Figure 16. Planar MoS<sub>2</sub> FET.** (a) Optical image of the conventional in-plane MoS<sub>2</sub> FET made of the as-grown MoS<sub>2</sub> on SiO<sub>2</sub>. The triangle represents our single layer TMD sample, and the gold bars show the deposited electrodes. (b) Transfer characteristic curve for the device shown in (a) at room temperature, the source-drain voltage is set to be 0.1 V. (c) Output characteristic curves measured at the same device in (a), while the gate voltage  $V_{GS}$  was swept from -100 to 100 V shown by the red arrow in the figure.

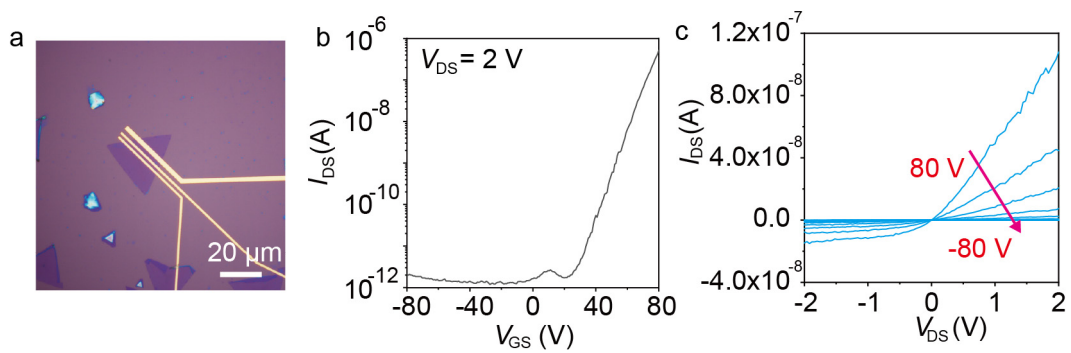

**Supplementary Figure 17. Planar WS<sub>2</sub> FET.** (a) Optical image of the conventional in-plane WS<sub>2</sub> FET made of the as-grown WS<sub>2</sub> on SiO<sub>2</sub>. The triangle represents our single layer TMD sample, and the gold bars show the deposited electrodes. (b) Transfer characteristic curve for the device shown in (a) at room temperature, the source-drain voltage is set to be 2 V. (c) Output characteristic curves measured at the same device in (a), while the gate voltage  $V_{GS}$  was swept from -80 to 80 V shown by the red arrow in the figure.

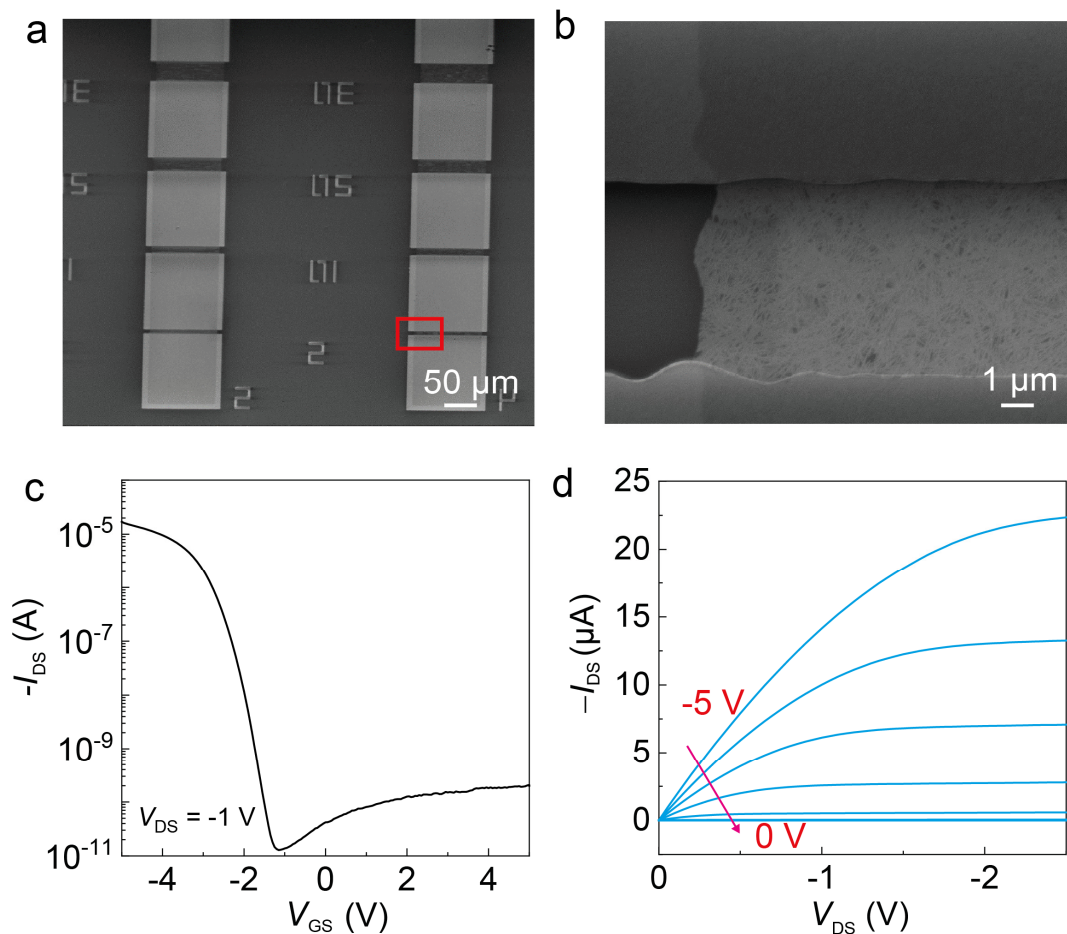

**Supplementary Figure 18. Planar CNT-film FET.** (a) SEM image of the conventional CNT-film FET made of the semiconducting CNT solution on SiO<sub>2</sub> with different channel sizes. (b) Magnification SEM image for the red rectangle section shown in (a), which shows that CNT-film with high density. (c) Transfer characteristic curve for the device shown in (b) at room temperature, the source-drain voltage is set to be -1 V. (d) Output characteristic curves measured for the same device in (b), while the gate voltage  $V_{GS}$  was swept from -5 to 0 V shown by the red arrow in the figure.

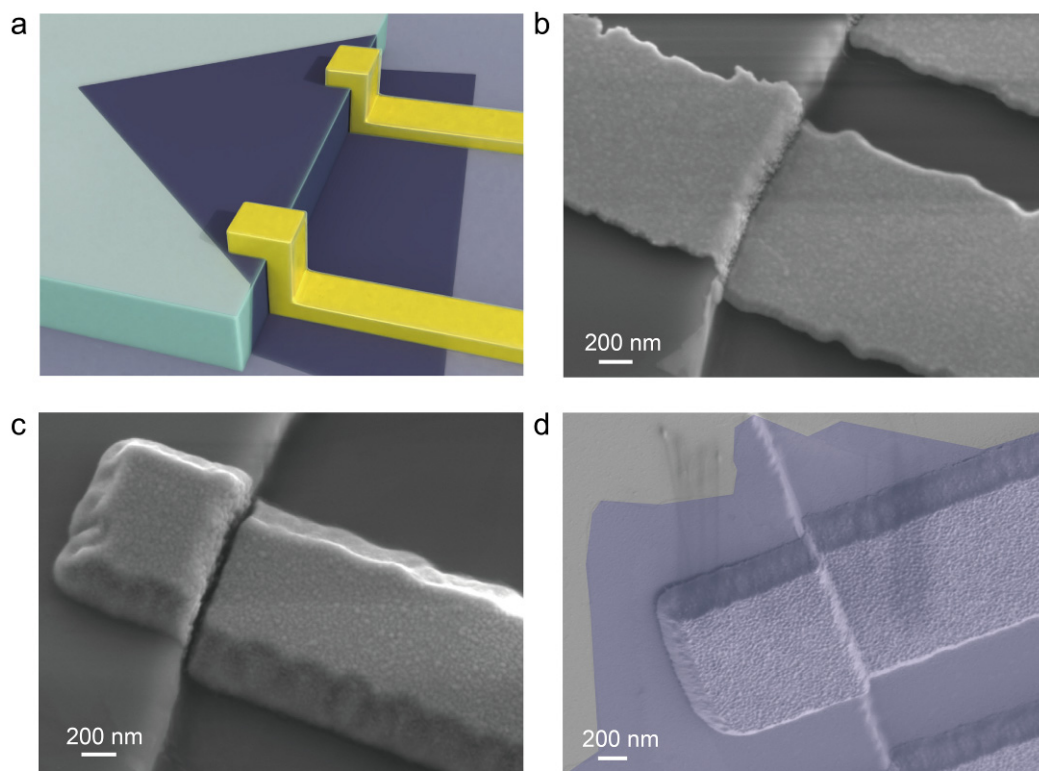

**Supplementary Figure 19. S/D electrodes with different thicknesses and evaporation directions.** (a) Schematic diagram of the S/D electrodes connected to the sidewall. (b) SEM image for the vertical evaporation 55 nm thickness electrodes. (c) SEM image for vertical evaporation electrodes with 255 nm thickness. (d) SEM image for the tilted evaporation electrodes with 255 nm thickness, the purple area shows the single layered MoS<sub>2</sub>.



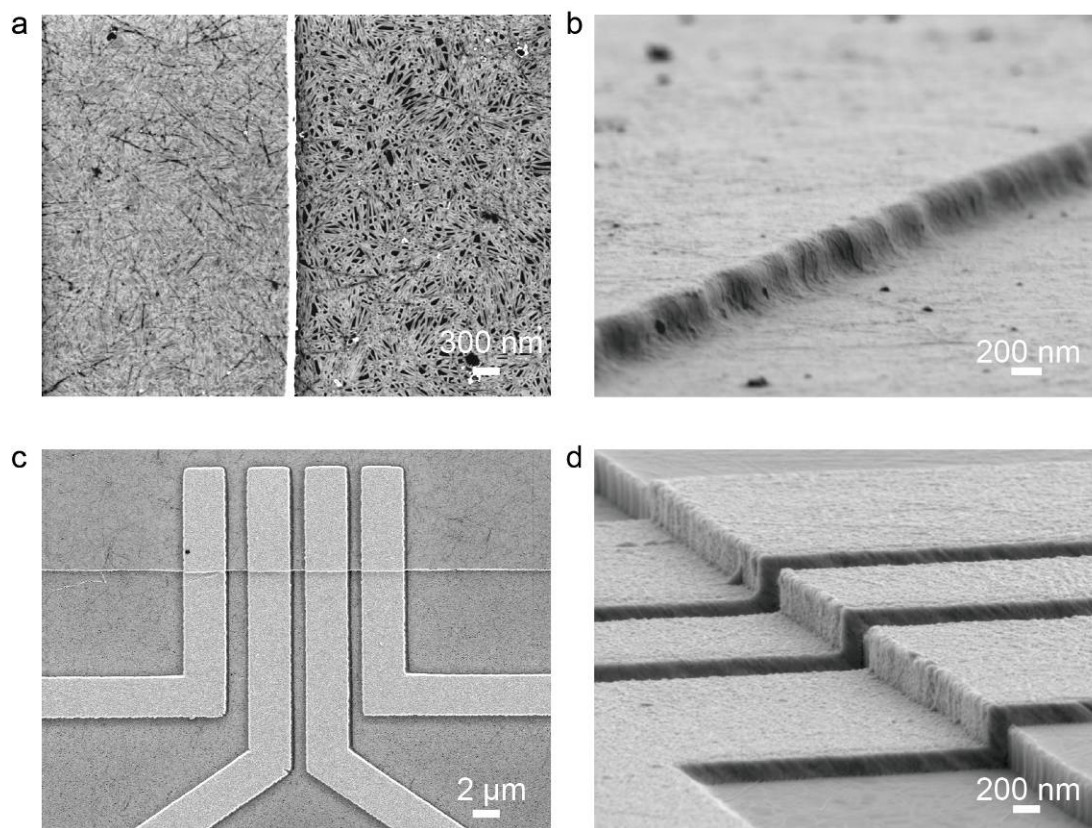

**Supplementary Figure 20. CNT-films and the S/D electrodes.** (a) and (b) are the SEM images at top and 80-degree inclination views for the morphology of the semiconducting CNT film covering the Si sidewalls, respectively. (c) and (d) are the SEM images at top and 80-degree inclination views for the morphology of the S/D electrodes connected by the CNT films.

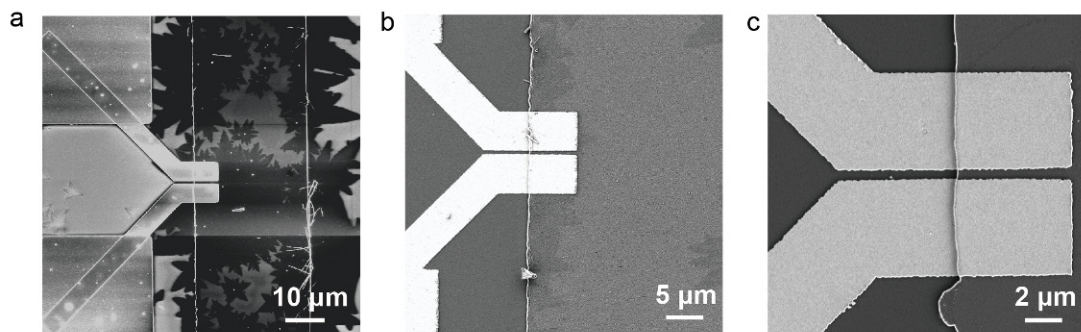

**Supplementary Figure 21. MoS<sub>2</sub> ML-FinFET fabrication process.** (a) SEM image for the 255 nm thickness S/D electrodes connecting the MoS<sub>2</sub> across the sidewall. (b) SEM image for the MoS<sub>2</sub>, while the planar part was etched away by RIE. (c) SEM image for device, while the Si step was wet etched by TMAH solution.

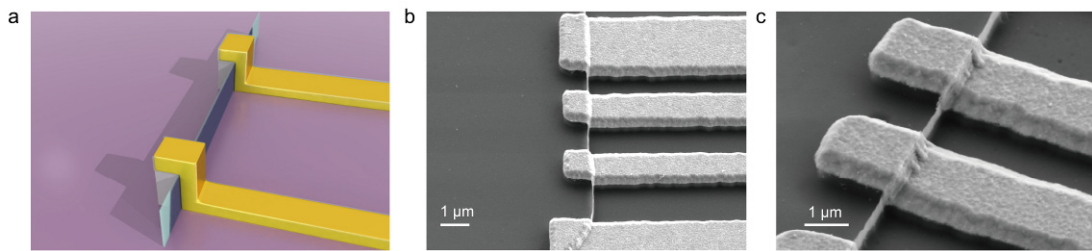

**Supplementary Figure 22. ML-fin structures after wet etching.** (a) Schematic diagram of the ML-fin after wet etching. (b) and (c) are the SEM images for different views of the ML-fin vertically standing after wet etching.

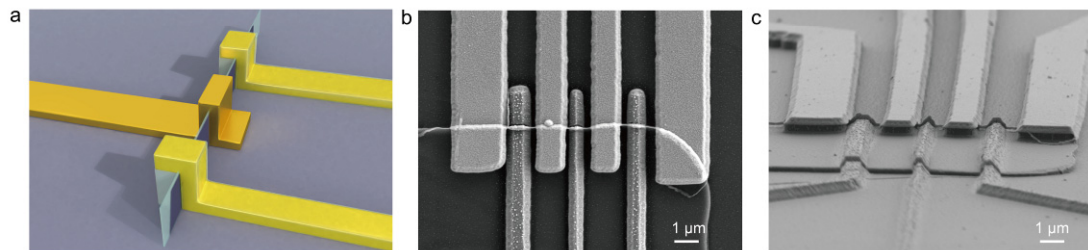

**Supplementary Figure 23. Characterizations of the ML-FinFETs with Metal Gates.** (a) Schematic diagram of the ML-FinFET with metal gates. (b) and (c) are SEM images at different angles of the gate electrodes overlapping the channel of the device.

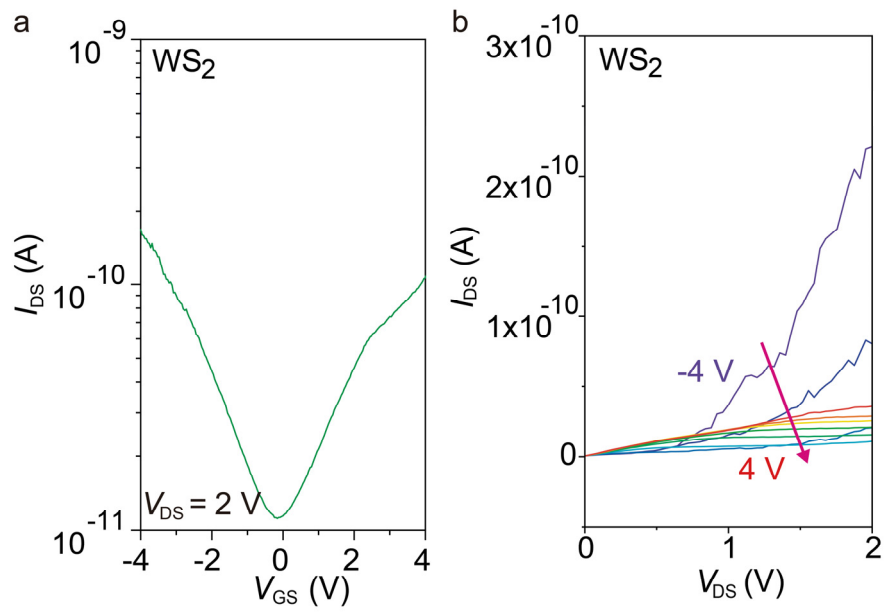

**Supplementary Figure 24. Electrical performances of WS<sub>2</sub> ML-FinFET.** (a) Transfer characteristic curve under  $V_{DS} = 2$  V for the WS<sub>2</sub> ML-FinFET shown in Fig. S23. (b)  $I$ - $V$  curves for the same WS<sub>2</sub> FinFET in (a) with  $V_{GS}$  sweeping from -4 to 4 V.

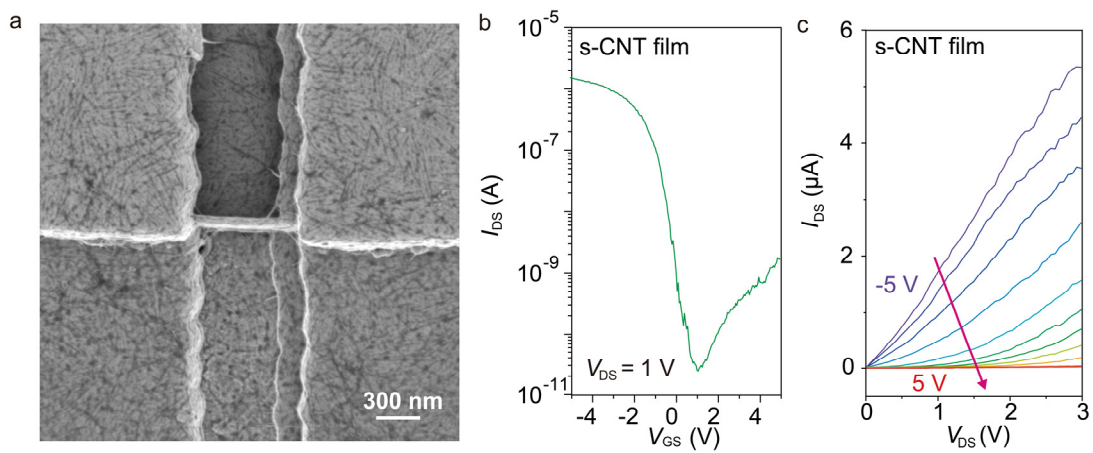

**Supplementary Figure 25. CNT-film FinFET with CNT-film gate and its electrical performances.** (a) SEM image for the morphology of the semiconducting CNT film fin covered by metallic CNT films as the gate. (b) Transfer characteristic curve of the CNT-film FinFET in (a). (c) Output characteristic curves of the CNT-film FinFETs in (a) with the  $V_{GS}$  sweeping from -5 to 5 V.

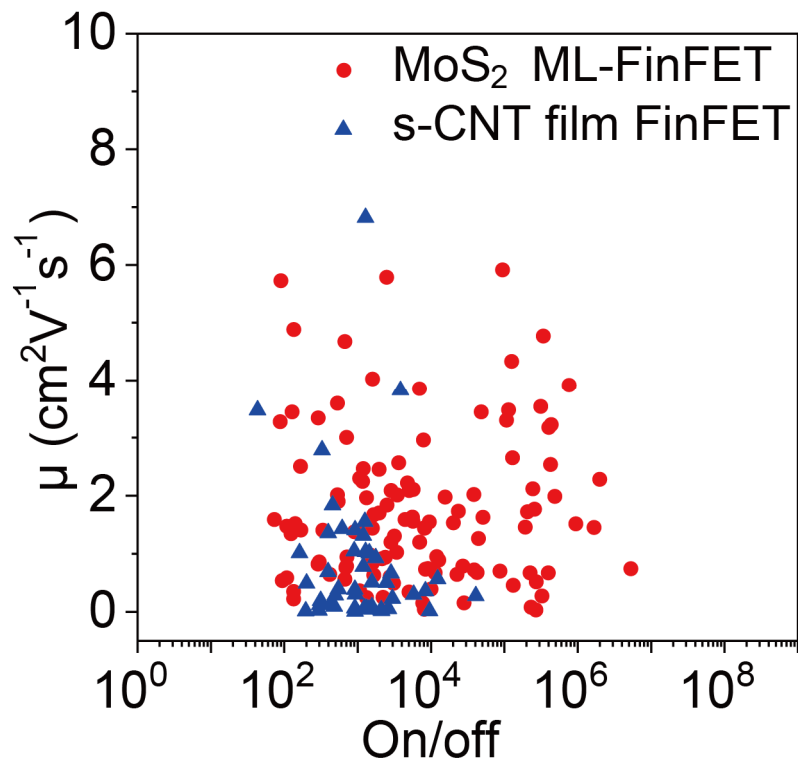

**Supplementary Figure 26. Statistics of mobilities  $\mu$  and on/off ratios of ML-FinFETs.** More than one hundred of our MoS<sub>2</sub> ML-FinFET and semiconducting CNT-film-FinFETs devices are tested and the maximum on/off ratio and mobility are  $10^7$  and  $6 \text{ cm}^2\text{V}^{-1}\text{s}^{-1}$ , respectively.

**Supplementary Table 1. The material properties used in COMSOL simulations.**

| $W_{\text{fin}}$<br>(nm) <sup>[1]</sup> | $E_{\text{gap}}$<br>(eV) <sup>[2]</sup> | $\epsilon_{\text{MoS}_2}$<br>(relative) <sup>[3]</sup> | $\epsilon_{\text{HfO}_2}$<br>(relative) <sup>[4]</sup> | $m_{\text{e}}^*$<br>( $m_0$ ) <sup>[5]</sup> | $m_{\text{h}}^*$<br>( $m_0$ ) <sup>[5]</sup> | $\chi$<br>(eV) <sup>[6]</sup> | $\mu_{\text{e}}$<br>( $\text{cm}^2\text{V}^{-1}\text{s}^{-1}$ ) <sup>[7]</sup> | $\mu_{\text{h}}$<br>( $\text{cm}^2\text{V}^{-1}\text{s}^{-1}$ ) <sup>[7]</sup> |
|-----------------------------------------|-----------------------------------------|--------------------------------------------------------|--------------------------------------------------------|----------------------------------------------|----------------------------------------------|-------------------------------|--------------------------------------------------------------------------------|--------------------------------------------------------------------------------|
| 0.65                                    | 1.89                                    | 3.93                                                   | 25                                                     | 0.37                                         | 2.8                                          | 4                             | 130                                                                            | 270                                                                            |

Here,  $W_{\text{fin}}$  is the thickness of fin channel,

$E_{\text{gap}}$  is the band gap of monolayer MoS<sub>2</sub>,

$\epsilon_{\text{MoS}_2(\text{HfO}_2)}$  is the relative dielectric constant of single layer MoS<sub>2</sub>(HfO<sub>2</sub>),

$m_{\text{e}}^*$  ( $m_{\text{h}}^*$ ) is the electron (hole) effective mass of MoS<sub>2</sub> single layer,

$\chi$  is the electron affinities of monolayer MoS<sub>2</sub>,

$\mu_{\text{e}}$  ( $\mu_{\text{h}}$ ) is the electron (hole) mobilities.



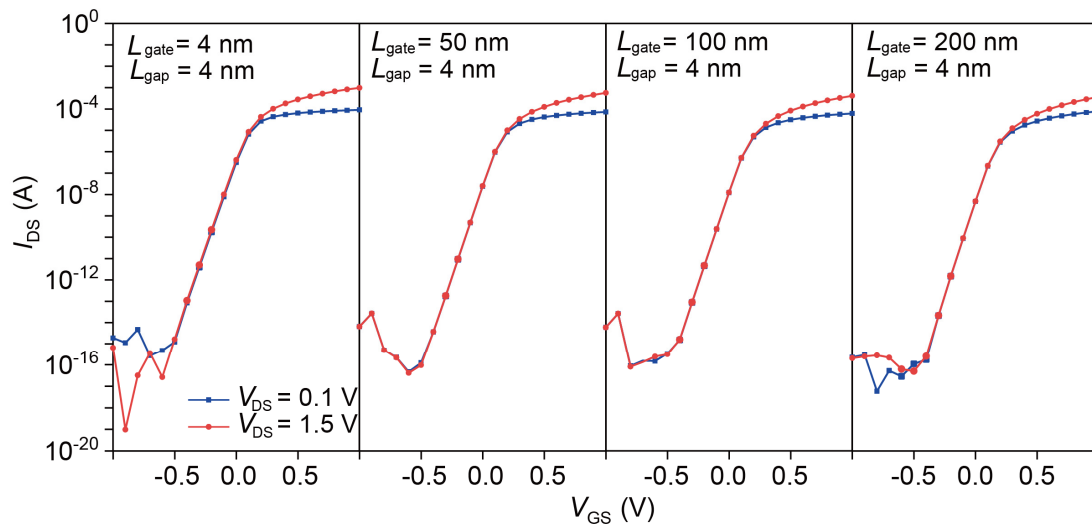

**Supplementary Figure 27. COMSOL simulated Fin-FETs with different gate lengths.** The field effect curves from COMSOL results for different gate lengths ( $L_{gate}$ ) at  $V_{DS} = 0.1$  and  $1.5$  V, respectively.

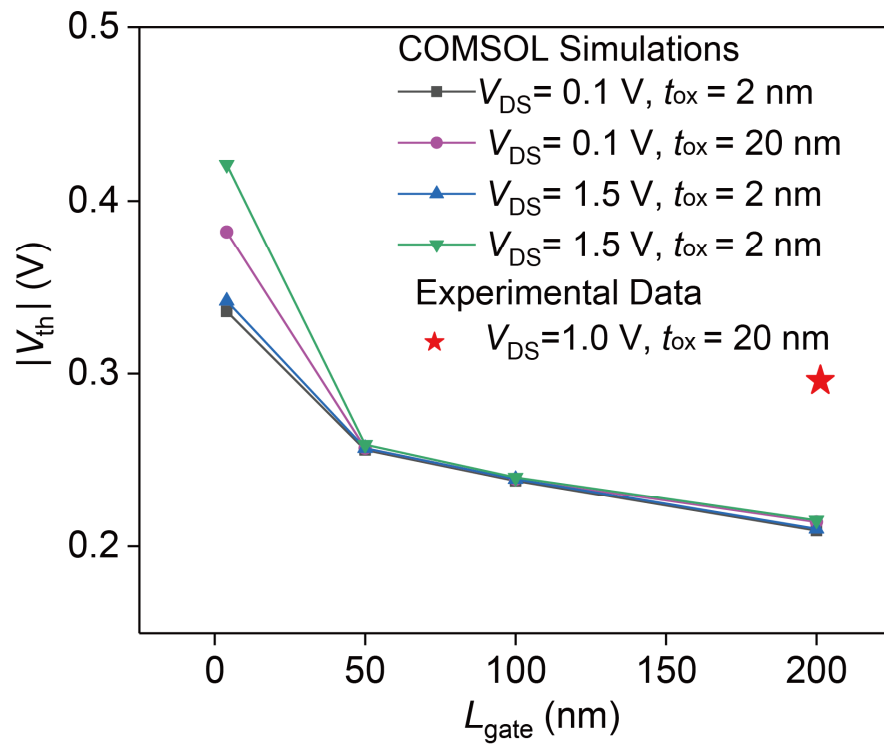

**Supplementary Figure 28.**  $|V_{\text{th}}|$  calculated from the simulations. The  $|V_{\text{th}}|$  are obtained by extracting the  $V_{\text{GS}}$  at  $I_{\text{DS}}=10^{-12}$  A. The experimental data was obtained in the device shown in Figure 3a in the main text.

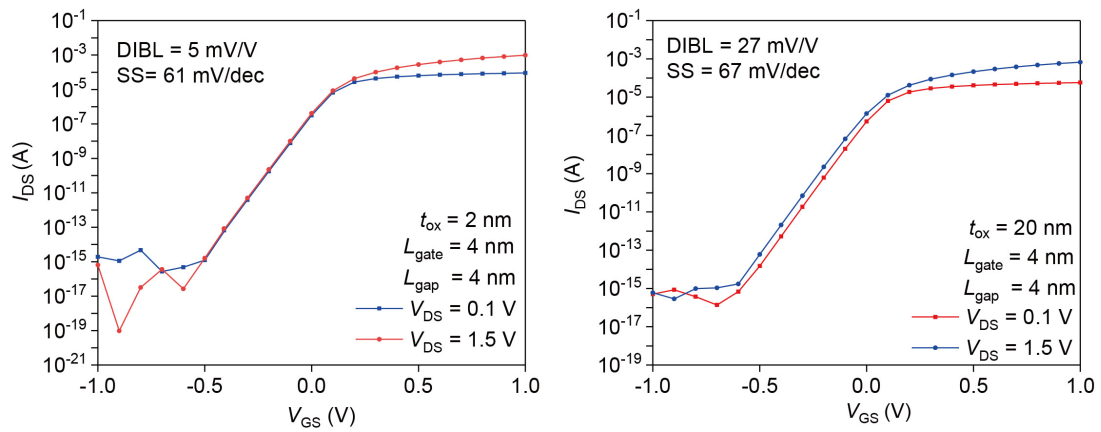

**Supplementary Figure 29. COMSOL simulated Fin-FETs with different thickness of the dielectric material.** The field effect curves of  $L_{gate} = 4$  nm ML-FinFET for 2 and 20 nm dielectric thickness, respectively.

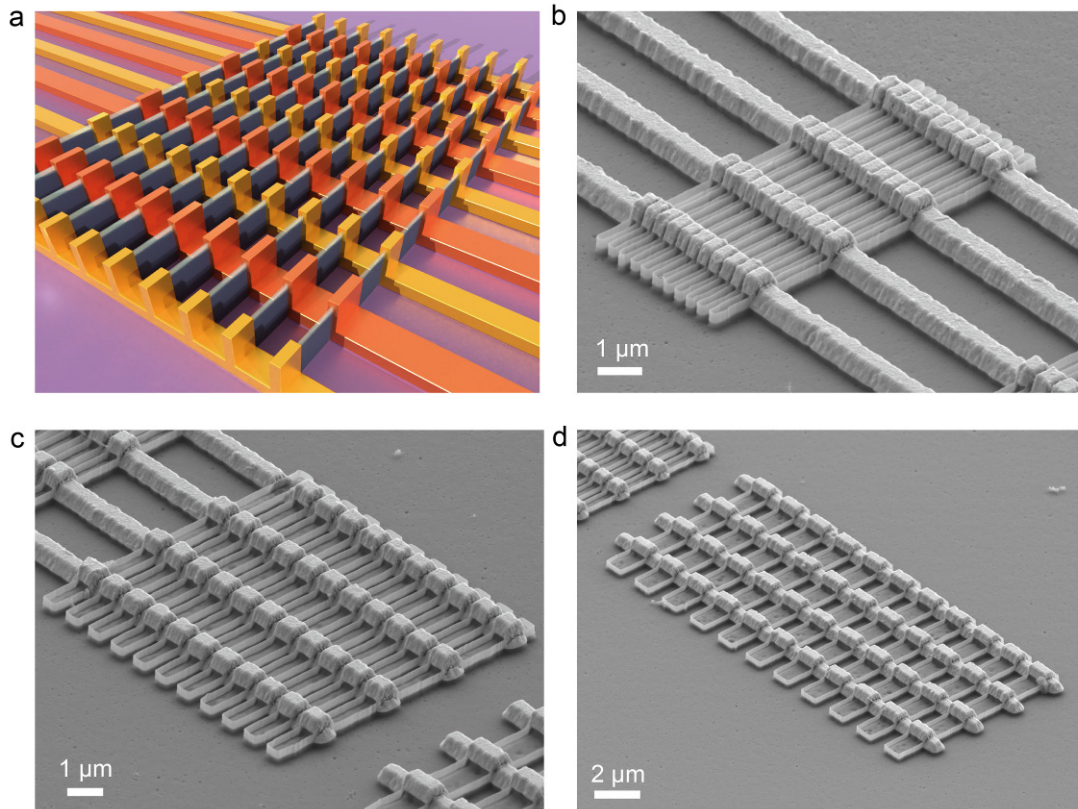

**Supplementary Figure 30. Field effect transistors made of ML-Fin arrays.** (a) Schematic of a FET with ML-Fin-array. (b)-(d) SEM images of MoS<sub>2</sub> Fin arrays with different fin spacings and channel lengths.

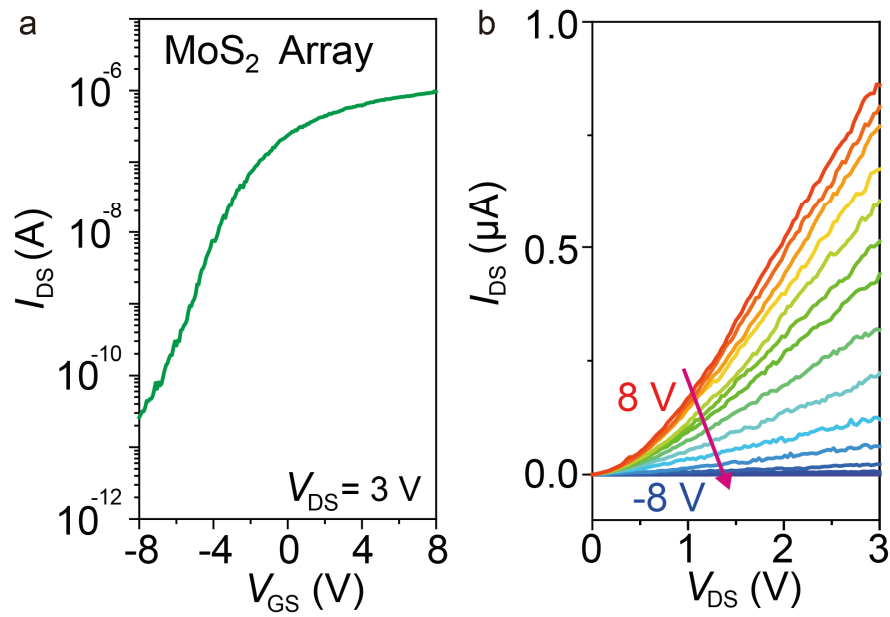

**Supplementary Figure 31. Electrical transport performances of a typical FET with the MoS<sub>2</sub> ML-fin-array.** (a) Transfer characteristic curve under  $V_{DS} = 3$  V for the MoS<sub>2</sub> FET with ML-Fin-array shown in Supplementary Figure 29. (b)  $I$ - $V$  curves for the same MoS<sub>2</sub> FET with ML-Fin-array in (a) with  $V_{GS}$  sweeping from 8 to -8 V.

## References

- [1] Y. Li, A. Chernikov, X. Zhang, A. Rigosi, H. M Hill, A. M van der Zande, D. A. Chenet, E. M. Shih, J. Hone, T. F. Heinz, Measurement of the optical dielectric function of monolayer transition-metal dichalcogenides: MoS<sub>2</sub>, MoSe<sub>2</sub>, WS<sub>2</sub>, and WSe<sub>2</sub>. *Phys. Rev. B* 90, 205422 (2014).
- [2] K. F. Mak, C. Lee, J. Hone, J. Shan, T. F. Heinz, Atomically thin MoS<sub>2</sub>: A new direct-gap semiconductor. *Phys. Rev. Lett.* 105, 136805 (2010).
- [3] X. Chen, Z. Wu, S. Xu, L. Wang, R. Huang, Y. Han, W. Ye, W. Xiong, T. Han, G. Long, Y. Wang, Y. He, Y. Cai, P. Sheng, N. Wang, Probing the electron states and metal-insulator transition mechanisms in molybdenum disulphide vertical heterostructures. *Nat. Commun.* 6, 6088 (2015).
- [4] J. Robertson, High dielectric constant oxides. *Eur. Phys. J. Appl. Phys.* 28, 265–291 (2004).
- [5] H. Peelaers and C. G. Van de Walle, Effects of strain on band structure and effective masses in MoS<sub>2</sub>. *Phys. Rev. B* 86, 241401(R) (2012).
- [6] S. L. Howell, D. Jariwala, C. C. Wu, K. S. Chen, V. K. Sangwan, J. Kang, T. J. Marks, M. C. Hersam, L. J. Lauhon, Investigation of Band-Offsets at Monolayer–Multilayer MoS<sub>2</sub> Junctions by Scanning Photocurrent Microscopy. *Nano Lett.* 2015, 15, 4, 2278-2284 (2015).
- [7] X. Li, J. T. Mullen, Z. Jin, K. M. Borysenko, M. Buongiorno Nardelli, and K. W. Kim, *Phys. Rev. B* 87, 115418 (2013).
